# Supplementary material for: Using JADES NIRCam photometry to investigate the dependence of stellar mass inferences on the IMF in the early universe
Source: PubMed Central journal article supplement (PMC11494360; doi:10.1073/pnas.2317375121), 2024-10-08
Supplement: pnas.2317375121.sapp.pdf [file pnas.2317375121.sapp.pdf]

# PNAS



1

## 2 Supporting Information for

### 3 JADES: Using NIRCам Photometry to Investigate the Dependence of Stellar Mass Inferences 4 on the IMF in the Early Universe

5 Charity Woodrum, Marcia Rieke, Zhiyuan Ji, William M. Baker, Rachana Bhatawdekar, Andrew J. Bunker, Stéphane Charlot,  
6 Emma Curtis-Lake, Daniel J. Eisenstein, Kevin Hainline, Ryan Hausen, Jakob M. Helton, Raphael E. Hviding, Benjamin D.  
7 Johnson, Brant Robertson, Fengwu Sun, Sandro Tacchella, Lily Whitler, Christina C. Williams, and Christopher N.A. Willmer

8 **Marcia Rieke**

9 **E-mail: [mrieke@as.arizona.edu](mailto:mrieke@as.arizona.edu)**

#### 10 **This PDF file includes:**

- 11 Supporting text
- 12 Table S1
- 13 SI References

## 14 Supporting Information Text

15 Multi-band photometry and **Prospector** output for 102 galaxies are presented in an excel spreadsheet. One tab presents the  
 16 **Prospector** output and a second tab labelled "Photometric Data" presents the fluxes for each galaxy in nJy in a Kron-radius  
 17 size aperture for all filters used. Ref. (1) describes the measurement of these fluxes. The filters included in the spreadsheet for  
 18 all galaxies include F090W, F115W, F150W, F200W, F277W, F356W, F410M, and F444W. Those galaxies which also have  
 19 measurements from JEMS have photometry in the filters F182M, F210M, F335M, F430M, F460M, and F480M. Note that the  
 20 filter designations indicate the center wavelength as 100x wavelength in microns and W indicates  $\lambda/\delta\lambda = 4$  and M indicates  
 21  $\lambda/\delta\lambda \sim 10$ .

22 The **Prospector** output tabulated in the spreadsheet includes the JADES identification number which can be used to  
 23 find the galaxies in the JADES photometric catalog available from the Space Telescope Science Institute High Level Science  
 24 Products (HLSP) at the Mikulski Archive for Space Telescopes (MAST). The other entries on the spreadsheet include right  
 25 ascension, declination, spectroscopic and photometric redshifts, and redshift source. Table S1 lists the **Prospector**-specific  
 26 output parameters. As described in the main body of the paper, the IMF used is shown in this equation:

$$\xi(m) = \begin{cases} A_l(0.5n_c m_c)^{-x} \exp\left[-\frac{(\log m - \log m_c)^2}{2\sigma^2}\right], & m \leq n_c m_c, \\ A_h m^{-x}, & m > n_c m_c \end{cases} \quad [1]$$

27 with  $m_c \propto (1+z)^\beta$ ,  $\beta=1, 1.5$  or  $2$ ,  $A_l = 0.140$ ,  $n_c = 25$ ,  $\sigma = 0.69$ ,  $A_h = 0.0443$ , and  $x=1.3$

**Table S1. Prospector output parameters**

| Parameter                                                                       | Spreadsheet Column Label                           |
|---------------------------------------------------------------------------------|----------------------------------------------------|
| Total Mass (IMF with $\beta = 1$ )                                              | $\log(M_{total})$                                  |
| Remaining Stellar Mass (Chabrier (2) IMF)                                       | $\log(M_{star})$ (C03)                             |
| Remaining Stellar Mass (IMF with $\beta = 1.0$ )                                | $\log(M_{star})$ ( $\beta = 1.0$ )                 |
| Remaining Stellar Mass (IMF with $\beta = 1.5$ Lower mass limit = $3 M_\odot$ ) | $\log(M_{star})$ ( $\beta = 1.0$ ) $M_{limit} = 3$ |
| Mass weighted age of the galaxy in years                                        | $\log(\text{age})$                                 |
| Dust optical depth to newly formed stars                                        | $\tau_1$                                           |
| Dust optical depth affecting all stars                                          | $\tau_2$                                           |
| Modifier for the dust attenuation power law                                     | n                                                  |
| Intergalactic medium attenuation curve scale factor                             | $f_{IGM}$                                          |
| Stellar metallicity                                                             | $Z_*$                                              |
| Gas metallicity                                                                 | $Z_{gas}$                                          |
| Nebular emission ionization parameter                                           | U                                                  |

## 28 References

- 29 1. MJ Rieke, et al., JADES Initial Data Release for the Hubble Ultra Deep Field: Revealing the Faint Infrared Sky with Deep  
 30 JWST NIRCcam Imaging. *ApJS* **269**, 16 (2023).  
 31 2. G Chabrier, Galactic Stellar and Substellar Initial Mass Function. *PASP* **115**, 763–795 (2003).
